# Supplementary material for: Establishing plausibility of cardiovascular adverse effects of immunotherapies using Mendelian randomisation
Source: Front Cardiovasc Med. 2023 May 19;10:1116799. doi: 10.3389/fcvm.2023.1116799 (PMC10235787; doi:10.3389/fcvm.2023.1116799)
Supplement: Supplementary file 1 [file Table1.xlsx]

## Sheet: Table S1
Table S1. Mendelian randomisation results of cardiovascular risk factors on ischemic stroke.
method	b	se	lo_ci	up_ci	pval	exposure	outcome
Weighted median	0.146	0.042	0.065	0.228	<0.0001	BMI	Ischemic stroke
IVW	0.176	0.027	0.123	0.228	<0.0001	BMI	Ischemic stroke
PRESSO	0.175	0.026	0.125	0.225	<0.0001	BMI	Ischemic stroke
MR-APSS	0.032	0.007	0.019	0.046	<0.0001	BMI	Ischemic stroke
CAUSE	0.132	0.021	0.091	0.174	0.007	BMI	Ischemic stroke
MR-Egger	0.158	0.069	0.022	0.293	0.022	BMI	Ischemic stroke
(intercept)	0	0.001	-0.002	0.003	0.78	BMI	ischemic stroke
Weighted median	-0.012	0.031	-0.072	0.049	0.702	CKD	Ischemic stroke
IVW	0.02	0.027	-0.033	0.073	0.466	CKD	Ischemic stroke
PRESSO	0.019	0.018	-0.017	0.055	0.304	CKD	Ischemic stroke
MR-APSS	0.019	0.03	-0.04	0.077	0.537	CKD	Ischemic stroke
CAUSE	-0.005	0.017	-0.039	0.028	0.999	CKD	Ischemic stroke
MR-Egger	-0.031	0.069	-0.167	0.105	0.654	CKD	Ischemic stroke
(intercept)	0.005	0.006	-0.007	0.016	0.424	CKD	ischemic stroke
Weighted median	0.049	0.004	0.041	0.056	<0.0001	DBP	Ischemic stroke
IVW	0.043	0.003	0.036	0.049	<0.0001	DBP	Ischemic stroke
PRESSO	0.043	0.003	0.037	0.049	<0.0001	DBP	Ischemic stroke
MR-APSS	0.078	0.01	0.059	0.097	<0.0001	DBP	Ischemic stroke
CAUSE	0.031	0.003	0.025	0.037	<0.0001	DBP	Ischemic stroke
MR-Egger	0.054	0.008	0.038	0.069	<0.0001	DBP	Ischemic stroke
(intercept)	-0.002	0.001	-0.005	0.001	0.117	DBP	ischemic stroke
Weighted median	0.083	0.036	0.013	0.152	0.02	LDL	Ischemic stroke
IVW	0.086	0.024	0.04	0.132	<0.0001	LDL	Ischemic stroke
PRESSO	0.086	0.021	0.044	0.127	<0.0001	LDL	Ischemic stroke
MR-APSS	0.019	0.006	0.007	0.031	0.002	LDL	Ischemic stroke
CAUSE	0.069	0.024	0.022	0.117	0.087	LDL	Ischemic stroke
MR-Egger	0.116	0.034	0.048	0.183	0.001	LDL	Ischemic stroke
(intercept)	-0.001	0.001	-0.003	0.001	0.235	LDL	ischemic stroke
Weighted median	0.028	0.002	0.024	0.032	<0.0001	SBP	Ischemic stroke
IVW	0.027	0.002	0.023	0.03	<0.0001	SBP	Ischemic stroke
PRESSO	0.026	0.002	0.023	0.03	<0.0001	SBP	Ischemic stroke
MR-APSS	0.097	0.009	0.081	0.114	<0.0001	SBP	Ischemic stroke
CAUSE	0.019	0.002	0.016	0.023	<0.0001	SBP	Ischemic stroke
MR-Egger	0.036	0.005	0.026	0.045	<0.0001	SBP	Ischemic stroke
(intercept)	-0.003	0.001	-0.006	0	0.043	SBP	ischemic stroke
Weighted median	0.348	0.075	0.201	0.494	<0.0001	SMK	Ischemic stroke
IVW	0.294	0.054	0.187	0.401	<0.0001	SMK	Ischemic stroke
PRESSO	0.296	0.054	0.189	0.402	<0.0001	SMK	Ischemic stroke
MR-APSS	0.055	0.014	0.029	0.082	<0.0001	SMK	Ischemic stroke
CAUSE	0.235	0.046	0.144	0.325	0.014	SMK	Ischemic stroke
MR-Egger	0.186	0.221	-0.248	0.62	0.401	SMK	Ischemic stroke
(intercept)	0.002	0.003	-0.005	0.008	0.614	SMK	ischemic stroke
Weighted median	0.084	0.019	0.047	0.121	<0.0001	T2DM	Ischemic stroke
IVW	0.096	0.011	0.074	0.118	<0.0001	T2DM	Ischemic stroke
PRESSO	0.091	0.01	0.071	0.111	<0.0001	T2DM	Ischemic stroke
MR-APSS	0.076	0.01	0.056	0.096	<0.0001	T2DM	Ischemic stroke
CAUSE	0.076	0.01	0.056	0.095	<0.0001	T2DM	Ischemic stroke
MR-Egger	0.068	0.024	0.021	0.115	0.005	T2DM	Ischemic stroke
(intercept)	0.002	0.002	-0.001	0.005	0.185	T2DM	ischemic stroke
Weighted median	-0.008	0.037	-0.081	0.064	0.824	TG	Ischemic stroke
IVW	0.085	0.026	0.034	0.136	0.001	TG	Ischemic stroke
PRESSO	0.079	0.025	0.031	0.127	0.001	TG	Ischemic stroke
MR-APSS	0.021	0.006	0.008	0.033	0.001	TG	Ischemic stroke
CAUSE	0.111	0.036	0.04	0.183	0.393	TG	Ischemic stroke
MR-Egger	0.005	0.04	-0.073	0.084	0.895	TG	Ischemic stroke
(intercept)	0.002	0.001	0.001	0.004	0.01	TG	ischemic stroke
Weighted median	0.214	0.045	0.125	0.302	<0.0001	WHR	Ischemic stroke
IVW	0.212	0.034	0.145	0.279	<0.0001	WHR	Ischemic stroke
PRESSO	0.226	0.032	0.163	0.289	<0.0001	WHR	Ischemic stroke
MR-APSS	0.039	0.008	0.023	0.054	<0.0001	WHR	Ischemic stroke
CAUSE	0.149	0.027	0.095	0.202	0.006	WHR	Ischemic stroke
MR-Egger	0.111	0.096	-0.077	0.298	0.248	WHR	Ischemic stroke
(intercept)	0.002	0.002	-0.001	0.005	0.257	WHR	ischemic stroke
Abbreviations: b, estimate; se, standard error; lo_ci, 95% confidence interval lower limit; up_ci, 95% confidence interval upper limit; pval, p-value; IVW, inverse-variance weighted;PRESSO, Mendelian randomization pleiotropy residual sum and outlier; CAUSE, Causal Analysis Using Summary Effect estimates; MR-APSS, MR Accounting for Pleiotropy and Sample Structure; SBP, systolic blood pressure; DBP…

## Sheet: Table S2
Table S2. Expected log pointwise posterior density (ELPD) results
exposure	outcome	threshold*	nsnp	model1	model2	delta_elpd	se_delta_elpd	Z	pval
SBP	ischemic stroke	0.001	2808	sharing	causal	-5.862	1.418	-4.134	<0.0001
DBP	ischemic stroke	0.001	2803	sharing	causal	-5.529	1.51	-3.661	<0.0001
BMI	ischemic stroke	0.001	5643	sharing	causal	-4.386	1.767	-2.483	0.007
WHR	ischemic stroke	0.001	4430	sharing	causal	-3.615	1.423	-2.54	0.006
LDL	ischemic stroke	0.001	3142	sharing	causal	-2.456	1.804	-1.362	0.087
TG	ischemic stroke	0.001	3917	sharing	causal	-0.602	2.213	-0.272	0.393
SMK	ischemic stroke	0.001	2506	sharing	causal	-3.307	1.514	-2.185	0.014
T2DM	ischemic stroke	0.001	2510	sharing	causal	-6.037	1.72	-3.509	<0.0001
CKD	ischemic stroke	0.001	1876	sharing	causal	0.842	0.232	3.626	0.999
Abbreviations: SBP, systolic blood pressure; DBP, diastolic blood pressure; BMI, body mass index; WHR, waist-to-hip ratio; LDL, low-density lipoprotein cholesterol; TG, triglycerides; CKD, chronic kidney disease; T2DM, type 2 diabetes; SMK, smoking; nsnp, number of single nucleotide polymorphisms after clumping and being used for ELPD test; * p-value threshold used to compute the CAUSE posteriors…

## Sheet: Table S3
Table S3. Mendelian randomisation results of cardiovascular risk factors on self-reported tanning ability.
Method	Estimate	Std Error	lo_ci	up_ci	P-value	exposure	outcome
IVW	0.002	0.001	0	0.004	0.064	SBP	tanning ability
IVW	0.004	0.002	0	0.007	0.026	DBP	tanning ability
IVW	0.017	0.014	-0.01	0.044	0.215	BMI	tanning ability
IVW	0.007	0.015	-0.022	0.037	0.623	WHR	tanning ability
IVW	0.002	0.012	-0.022	0.025	0.885	LDL	tanning ability
IVW	0.03	0.019	-0.007	0.068	0.11	TG	tanning ability
IVW	-0.25	0.125	-0.494	-0.006	0.045	SMK	tanning ability
IVW	-0.003	0.007	-0.017	0.01	0.623	CKD	tanning ability
IVW	-0.001	0.012	-0.025	0.023	0.918	T2DM	tanning ability
IVW	-0.009	0.031	-0.07	0.052	0.769	ischemic stroke	tanning ability
Abbreviations: IVW, inverse-variance weighted; Std Error, standard error; lo_ci, 95% confidence interval lower limit; up_ci, 95% confidence interval upper limit; SBP, systolic blood pressure; DBP, diastolic blood pressure; BMI, body mass index; WHR, waist-to-hip ratio; LDL, low-density lipoprotein cholesterol; TG, triglycerides; CKD, chronic kidney disease; T2DM, type 2 diabetes; SMK, smoking.

## Sheet: Table S4
Table S4. The proportion of mediation effects
outcome	exposure	mediator	Total effect (%)	Direct effect (%)	Indirect effect (%)	proportion mediated (95% CI)
ischemic stroke	sbp	dbp	100	79.28	20.72	20.72% (-9.71% to 51.15% )
ischemic stroke	sbp	bmi	100	100	0	0
ischemic stroke	sbp	whr	100	96.89	3.11	3.11% (-16.08% to 22.31% )
ischemic stroke	sbp	ldl	100	100	0	0
ischemic stroke	sbp	tg	100	100	0	0
ischemic stroke	sbp	smk	100	100	0	0
ischemic stroke	sbp	ckd	100	98.23	1.77	1.77% (-17.63% to 21.16% )
ischemic stroke	dbp	ckd	100	98.28	1.72	1.72% (-19.21% to 22.66% )
ischemic stroke	dbp	sbp	100	34.79	65.21	65.21% (34.36% to 96.05% )
ischemic stroke	dbp	bmi	100	100	0	0
ischemic stroke	dbp	whr	100	93.54	6.46	6.46% (-13.72% to 26.64% )
ischemic stroke	dbp	ldl	100	100	0	0
ischemic stroke	dbp	tg	100	100	0	0
ischemic stroke	dbp	smk	100	100	0	0
ischemic stroke	bmi	ckd	100	98.59	1.41	1.41% (-40.88% to 43.69% )
ischemic stroke	whr	ckd	100	98.18	1.82	1.82% (-42.31% to 45.95% )
ischemic stroke	bmi	sbp	100	100	0	0
ischemic stroke	bmi	dbp	100	100	0	0
ischemic stroke	bmi	whr	100	67.84	32.16	32.16% (-12.70% to 77.02% )
ischemic stroke	bmi	ldl	100	90.49	9.51	9.51% (-33.82% to 52.84% )
ischemic stroke	bmi	tg	100	86.16	13.84	13.84% (-27.35% to 55.03% )
ischemic stroke	bmi	smk	100	73.97	26.03	26.03% (-13.21% to 65.28% )
ischemic stroke	ldl	ckd	100	100	0	0
ischemic stroke	tg	ckd	100	98.93	1.07	1.07% (-83.25% to 85.40% )
ischemic stroke	whr	sbp	100	74.66	25.34	25.34% (-21.43% to 72.11% )
ischemic stroke	whr	dbp	100	81.57	18.43	18.43% (-29.09% to 65.94% )
ischemic stroke	whr	bmi	100	63.31	36.69	36.69% (-8.64% to 82.02% )
ischemic stroke	whr	ldl	100	93.43	6.57	6.57% (-39.90% to 53.04% )
ischemic stroke	whr	tg	100	94.8	5.2	5.20% (-43.16% to 53.56% )
ischemic stroke	whr	smk	100	86.94	13.06	13.06% (-29.12% to 55.24% )
ischemic stroke	smk	ckd	100	100	0	0
ischemic stroke	t2d	ckd	100	100	0	0
ischemic stroke	ldl	sbp	100	68.9	31.1	31.10% (-37.61% to 99.82% )
ischemic stroke	ldl	dbp	100	90.2	9.8	9.80% (-65.51% to 85.12% )
ischemic stroke	ldl	bmi	100	100	0	0
ischemic stroke	ldl	whr	100	100	0	0
ischemic stroke	ldl	tg	100	100	0	0
ischemic stroke	ldl	smk	100	100	0	0
ischemic stroke	sbp	t2d	100	93.54	6.46	6.46% (-12.55% to 25.48% )
ischemic stroke	dbp	t2d	100	98.06	1.94	1.94% (-18.38% to 22.26% )
ischemic stroke	tg	sbp	100	50.32	49.68	49.68% (-21.40% to 120.77% )
ischemic stroke	tg	dbp	100	37.91	62.09	62.09% (-4.73% to 128.92% )
ischemic stroke	tg	bmi	100	79.5	20.5	20.50% (-54.05% to 95.05% )
ischemic stroke	tg	whr	100	58.72	41.28	41.28% (-30.72% to 113.28% )
ischemic stroke	tg	ldl	100	92.56	7.44	7.44% (-79.45% to 94.33% )
ischemic stroke	tg	smk	100	83.74	16.26	16.26% (-60.64% to 93.15% )
ischemic stroke	bmi	t2d	100	46.85	53.15	53.15% (17.21% to 89.10% )
ischemic stroke	whr	t2d	100	57.08	42.92	42.92% (4.17% to 81.67% )
ischemic stroke	smk	sbp	100	100	0	0
ischemic stroke	smk	dbp	100	100	0	0
ischemic stroke	smk	bmi	100	93.2	6.8	6.80% (-50.86% to 64.45% )
ischemic stroke	smk	whr	100	75.24	24.76	24.76% (-27.97% to 77.49% )
ischemic stroke	smk	ldl	100	100	0	0
ischemic stroke	smk	tg	100	92.84	7.16	7.16% (-51.45% to 65.76% )
ischemic stroke	ldl	t2d	100	100	0	0
ischemic stroke	tg	t2d	100	27.95	72.05	72.05% (10.63% to 133.46% )
ischemic stroke	t2d	sbp	100	80.45	19.55	19.55% (-16.14% to 55.23% )
ischemic stroke	t2d	dbp	100	89.15	10.85	10.85% (-24.26% to 45.96% )
ischemic stroke	t2d	bmi	100	84.69	15.31	15.31% (-16.68% to 47.31% )
ischemic stroke	t2d	whr	100	90.77	9.23	9.23% (-23.64% to 42.10% )
ischemic stroke	t2d	ldl	100	100	0	0
ischemic stroke	t2d	tg	100	100	0	0
ischemic stroke	t2d	smk	100	100	0	0
ischemic stroke	smk	t2d	100	89.13	10.87	10.87% (-40.48% to 62.22% )
Abbreviations: SBP, systolic blood pressure; DBP, diastolic blood pressure; BMI, body mass index; WHR, waist-to-hip ratio; LDL, low-density lipoprotein cholesterol; TG, triglycerides; CKD, chronic kidney disease; T2DM, type 2 diabetes; SMK, smoking

## Sheet: Table S5
Table S5. The proportion of mediation effects (including HbA1c, eGFR instead of T2DM, CKD, respectively)
outcome	exposure	mediator	Total effect (%)	Direct effect (%)	Indirect effect (%)	Mediated effect (95% CI)
ischemic stroke	sbp	dbp	100	79.28	20.72	20.72% (-9.71% to 51.15% )
ischemic stroke	sbp	bmi	100	100	0	0
ischemic stroke	sbp	whr	100	96.89	3.11	3.11% (-16.08% to 22.31% )
ischemic stroke	sbp	ldl	100	100	0	0
ischemic stroke	sbp	tg	100	100	0	0
ischemic stroke	sbp	smk	100	100	0	0
ischemic stroke	sbp	egfr	100	100	0	0
ischemic stroke	dbp	egfr	100	100	0	0
ischemic stroke	dbp	sbp	100	34.79	65.21	65.21% (34.36% to 96.05% )
ischemic stroke	dbp	bmi	100	100	0	0
ischemic stroke	dbp	whr	100	93.54	6.46	6.46% (-13.72% to 26.64% )
ischemic stroke	dbp	ldl	100	100	0	0
ischemic stroke	dbp	tg	100	100	0	0
ischemic stroke	dbp	smk	100	100	0	0
ischemic stroke	bmi	egfr	100	94.55	5.45	5.45% (-36.19% to 47.08% )
ischemic stroke	whr	egfr	100	94.54	5.46	5.46% (-40.09% to 51.01% )
ischemic stroke	bmi	sbp	100	100	0	0
ischemic stroke	bmi	dbp	100	100	0	0
ischemic stroke	bmi	whr	100	67.84	32.16	32.16% (-12.70% to 77.02% )
ischemic stroke	bmi	ldl	100	90.49	9.51	9.51% (-33.82% to 52.84% )
ischemic stroke	bmi	tg	100	86.16	13.84	13.84% (-27.35% to 55.03% )
ischemic stroke	bmi	smk	100	73.97	26.03	26.03% (-13.21% to 65.28% )
ischemic stroke	ldl	egfr	100	100	0	0
ischemic stroke	tg	egfr	100	97.17	2.83	2.83% (-81.21% to 86.86% )
ischemic stroke	whr	sbp	100	74.66	25.34	25.34% (-21.43% to 72.11% )
ischemic stroke	whr	dbp	100	81.57	18.43	18.43% (-29.09% to 65.94% )
ischemic stroke	whr	bmi	100	63.31	36.69	36.69% (-8.64% to 82.02% )
ischemic stroke	whr	ldl	100	93.43	6.57	6.57% (-39.90% to 53.04% )
ischemic stroke	whr	tg	100	94.8	5.2	5.20% (-43.16% to 53.56% )
ischemic stroke	whr	smk	100	86.94	13.06	13.06% (-29.12% to 55.24% )
ischemic stroke	smk	egfr	100	100	0	0
ischemic stroke	sbp	hba1c	100	98.1	1.9	1.90% (-17.40% to 21.20% )
ischemic stroke	ldl	sbp	100	68.9	31.1	31.10% (-37.61% to 99.82% )
ischemic stroke	ldl	dbp	100	90.2	9.8	9.80% (-65.51% to 85.12% )
ischemic stroke	ldl	bmi	100	100	0	0
ischemic stroke	ldl	whr	100	100	0	0
ischemic stroke	ldl	tg	100	100	0	0
ischemic stroke	ldl	smk	100	100	0	0
ischemic stroke	dbp	hba1c	100	100	0	0
ischemic stroke	bmi	hba1c	100	85.37	14.63	14.63% (-24.93% to 54.19% )
ischemic stroke	tg	sbp	100	50.32	49.68	49.68% (-21.40% to 120.77% )
ischemic stroke	tg	dbp	100	37.91	62.09	62.09% (-4.73% to 128.92% )
ischemic stroke	tg	bmi	100	79.5	20.5	20.50% (-54.05% to 95.05% )
ischemic stroke	tg	whr	100	58.72	41.28	41.28% (-30.72% to 113.28% )
ischemic stroke	tg	ldl	100	92.56	7.44	7.44% (-79.45% to 94.33% )
ischemic stroke	tg	smk	100	83.74	16.26	16.26% (-60.64% to 93.15% )
ischemic stroke	whr	hba1c	100	100	0	0
ischemic stroke	ldl	hba1c	100	100	0	0
ischemic stroke	smk	sbp	100	100	0	0
ischemic stroke	smk	dbp	100	100	0	0
ischemic stroke	smk	bmi	100	93.2	6.8	6.80% (-50.86% to 64.45% )
ischemic stroke	smk	whr	100	75.24	24.76	24.76% (-27.97% to 77.49% )
ischemic stroke	smk	ldl	100	100	0	0
ischemic stroke	smk	tg	100	92.84	7.16	7.16% (-51.45% to 65.76% )
ischemic stroke	tg	hba1c	100	93.7	6.3	6.30% (-76.66% to 89.27% )
ischemic stroke	smk	hba1c	100	100	0	0
Abbreviations: SBP, systolic blood pressure; DBP, diastolic blood pressure; BMI, body mass index; WHR, waist-to-hip ratio; LDL, low-density lipoprotein cholesterol; TG, triglycerides; SMK, smoking; HbA1c, glycated haemoglobin ; eGFR, estimated glomerular filtration rate.

## Sheet: Table S6
Table S6. Significant pathways enriched in the gene lists of the risk factors under study.
Trait	Pathway identifier	Pathway name	Pathway name higher level	Entities found	Entities total	Entities ratio	Entities pValue	Entities FDR	Species identifier	Species name
SBP	R-HSA-983170	Antigen Presentation: Folding, assembly and peptide loading of class I MHC	Class I MHC mediated antigen processing & presentation	54	108	0.007	<0.0001	<0.0001	9606	Homo sapiens
SBP	R-HSA-1236975	Antigen processing-Cross presentation	Class I MHC mediated antigen processing & presentation	56	195	0.013	<0.0001	<0.0001	9606	Homo sapiens
SBP	R-HSA-983169	Class I MHC mediated antigen processing & presentation	Class I MHC mediated antigen processing & presentation	73	479	0.032	<0.0001	0.028	9606	Homo sapiens
SBP	R-HSA-1236977	Endosomal/Vacuolar pathway	Class I MHC mediated antigen processing & presentation	50	82	0.005	<0.0001	<0.0001	9606	Homo sapiens
SBP	R-HSA-1236974	ER-Phagosome pathway	Class I MHC mediated antigen processing & presentation	53	173	0.011	<0.0001	<0.0001	9606	Homo sapiens
SBP	R-HSA-202433	Generation of second messenger molecules	TCR signaling	16	59	0.004	<0.0001	0.039	9606	Homo sapiens
SBP	R-HSA-909733	Interferon alpha/beta signaling	Interferon alpha/beta signaling	51	190	0.013	<0.0001	<0.0001	9606	Homo sapiens
SBP	R-HSA-877300	Interferon gamma signaling	Interferon gamma signaling	75	252	0.017	<0.0001	<0.0001	9606	Homo sapiens
SBP	R-HSA-913531	Interferon Signaling	Interferon Signaling	78	397	0.026	<0.0001	<0.0001	9606	Homo sapiens
SBP	R-HSA-389948	PD-1 signaling	Costimulation by the CD28 family	17	45	0.003	<0.0001	0.001	9606	Homo sapiens
SBP	R-HSA-202427	Phosphorylation of CD3 and TCR zeta chains	TCR signaling	18	45	0.003	<0.0001	<0.0001	9606	Homo sapiens
SBP	R-HSA-9705671	SARS-CoV-2 activates/modulates innate and adaptive immune responses	SARS-CoV-2-host interactions	53	227	0.015	<0.0001	<0.0001	9606	Homo sapiens
SBP	R-HSA-9705683	SARS-CoV-2-host interactions	SARS-CoV-2-host interactions	56	315	0.021	<0.0001	0.004	9606	Homo sapiens
SBP	R-HSA-202430	Translocation of ZAP-70 to Immunological synapse	TCR signaling	16	42	0.003	<0.0001	0.001	9606	Homo sapiens
DBP	R-HSA-983170	Antigen Presentation: Folding, assembly and peptide loading of class I MHC	Class I MHC mediated antigen processing & presentation	52	108	0.007	<0.0001	<0.0001	9606	Homo sapiens
DBP	R-HSA-1236975	Antigen processing-Cross presentation	Class I MHC mediated antigen processing & presentation	57	195	0.013	<0.0001	<0.0001	9606	Homo sapiens
DBP	R-HSA-983169	Class I MHC mediated antigen processing & presentation	Class I MHC mediated antigen processing & presentation	75	479	0.032	<0.0001	0.043	9606	Homo sapiens
DBP	R-HSA-388841	Costimulation by the CD28 family	Costimulation by the CD28 family	23	99	0.007	<0.0001	0.043	9606	Homo sapiens
DBP	R-HSA-1236977	Endosomal/Vacuolar pathway	Class I MHC mediated antigen processing & presentation	50	82	0.005	<0.0001	<0.0001	9606	Homo sapiens
DBP	R-HSA-1236974	ER-Phagosome pathway	Class I MHC mediated antigen processing & presentation	55	173	0.011	<0.0001	<0.0001	9606	Homo sapiens
DBP	R-HSA-202433	Generation of second messenger molecules	TCR signaling	19	59	0.004	<0.0001	0.003	9606	Homo sapiens
DBP	R-HSA-198933	Immunoregulatory interactions between a Lymphoid and a non-Lymphoid cell	Immunoregulatory interactions between a Lymphoid and a non-Lymphoid cell	54	316	0.021	<0.0001	0.043	9606	Homo sapiens
DBP	R-HSA-909733	Interferon alpha/beta signaling	Interferon alpha/beta signaling	54	190	0.013	<0.0001	<0.0001	9606	Homo sapiens
DBP	R-HSA-877300	Interferon gamma signaling	Interferon gamma signaling	81	252	0.017	<0.0001	<0.0001	9606	Homo sapiens
DBP	R-HSA-913531	Interferon Signaling	Interferon Signaling	88	397	0.026	<0.0001	<0.0001	9606	Homo sapiens
DBP	R-HSA-389948	PD-1 signaling	Costimulation by the CD28 family	20	45	0.003	<0.0001	<0.0001	9606	Homo sapiens
DBP	R-HSA-202427	Phosphorylation of CD3 and TCR zeta chains	TCR signaling	21	45	0.003	<0.0001	<0.0001	9606	Homo sapiens
DBP	R-HSA-9705671	SARS-CoV-2 activates/modulates innate and adaptive immune responses	SARS-CoV-2-host interactions	54	227	0.015	<0.0001	<0.0001	9606	Homo sapiens
DBP	R-HSA-9705683	SARS-CoV-2-host interactions	SARS-CoV-2-host interactions	56	315	0.021	<0.0001	0.015	9606	Homo sapiens
DBP	R-HSA-202430	Translocation of ZAP-70 to Immunological synapse	TCR signaling	19	42	0.003	<0.0001	<0.0001	9606	Homo sapiens
WHR	R-HSA-983170	Antigen Presentation: Folding, assembly and peptide loading of class I MHC	Class I MHC mediated antigen processing & presentation	52	108	0.007	<0.0001	<0.0001	9606	Homo sapiens
WHR	R-HSA-1236975	Antigen processing-Cross presentation	Class I MHC mediated antigen processing & presentation	56	195	0.013	<0.0001	<0.0001	9606	Homo sapiens
WHR	R-HSA-983169	Class I MHC mediated antigen processing & presentation	Class I MHC mediated antigen processing & presentation	72	479	0.032	<0.0001	0.002	9606	Homo sapiens
WHR	R-HSA-388841	Costimulation by the CD28 family	Costimulation by the CD28 family	23	99	0.007	<0.0001	0.004	9606	Homo sapiens
WHR	R-HSA-202424	Downstream TCR signaling	TCR signaling	24	124	0.008	<0.0001	0.036	9606	Homo sapiens
WHR	R-HSA-1236977	Endosomal/Vacuolar pathway	Class I MHC mediated antigen processing & presentation	49	82	0.005	<0.0001	<0.0001	9606	Homo sapiens
WHR	R-HSA-1236974	ER-Phagosome pathway	Class I MHC mediated antigen processing & presentation	56	173	0.011	<0.0001	<0.0001	9606	Homo sapiens
WHR	R-HSA-202433	Generation of second messenger molecules	TCR signaling	22	59	0.004	<0.0001	<0.0001	9606	Homo sapiens
WHR	R-HSA-198933	Immunoregulatory interactions between a Lymphoid and a non-Lymphoid cell	Immunoregulatory interactions between a Lymphoid and a non-Lymphoid cell	51	316	0.021	<0.0001	0.005	9606	Homo sapiens
WHR	R-HSA-909733	Interferon alpha/beta signaling	Interferon alpha/beta signaling	51	190	0.013	<0.0001	<0.0001	9606	Homo sapiens
WHR	R-HSA-877300	Interferon gamma signaling	Interferon gamma signaling	80	252	0.017	<0.0001	<0.0001	9606	Homo sapiens
WHR	R-HSA-913531	Interferon Signaling	Interferon Signaling	88	397	0.026	<0.0001	<0.0001	9606	Homo sapiens
WHR	R-HSA-389948	PD-1 signaling	Costimulation by the CD28 family	21	45	0.003	<0.0001	<0.0001	9606	Homo sapiens
WHR	R-HSA-202427	Phosphorylation of CD3 and TCR zeta chains	TCR signaling	22	45	0.003	<0.0001	<0.0001	9606	Homo sapiens
WHR	R-HSA-9705671	SARS-CoV-2 activates/modulates innate and adaptive immune responses	SARS-CoV-2-host interactions	56	227	0.015	<0.0001	<0.0001	9606	Homo sapiens
WHR	R-HSA-9694516	SARS-CoV-2 Infection	SARS-CoV-2 Infection	67	434	0.029	<0.0001	0.002	9606	Homo sapiens
WHR	R-HSA-9705683	SARS-CoV-2-host interactions	SARS-CoV-2-host interactions	63	315	0.021	<0.0001	<0.0001	9606	Homo sapiens
WHR	R-HSA-202403	TCR signaling	TCR signaling	28	147	0.01	<0.0001	0.017	9606	Homo sapiens
WHR	R-HSA-202430	Translocation of ZAP-70 to Immunological synapse	TCR signaling	20	42	0.003	<0.0001	<0.0001	9606	Homo sapiens
LDL	R-HSA-202433	Generation of second messenger molecules	TCR signaling	22	59	0.004	<0.0001	<0.0001	9606	Homo sapiens
LDL	R-HSA-389948	PD-1 signaling	Costimulation by the CD28 family	21	45	0.003	<0.0001	<0.0001	9606	Homo sapiens
LDL	R-HSA-202427	Phosphorylation of CD3 and TCR zeta chains	TCR signaling	21	45	0.003	<0.0001	<0.0001	9606	Homo sapiens
LDL	R-HSA-202430	Translocation of ZAP-70 to Immunological synapse	TCR signaling	20	42	0.003	<0.0001	<0.0001	9606	Homo sapiens
TG	R-HSA-9024446	NR1H2 and NR1H3-mediated signaling	NR1H2 and NR1H3-mediated signaling	31	85	0.006	<0.0001	<0.0001	9606	Homo sapiens
TG	R-HSA-9029569	NR1H3 & NR1H2 regulate gene expression linked to cholesterol transport and efflux	NR1H2 and NR1H3-mediated signaling	25	66	0.004	<0.0001	<0.0001	9606	Homo sapiens
SMK	R-HSA-181431	Acetylcholine binding and downstream events	Acetylcholine binding and downstream events	5	17	0.001	<0.0001	0.026	9606	Homo sapiens
SMK	R-HSA-629597	Highly calcium permeable nicotinic acetylcholine receptors	Acetylcholine binding and downstream events	5	11	0.001	<0.0001	0.017	9606	Homo sapiens
SMK	R-HSA-629594	Highly calcium permeable postsynaptic nicotinic acetylcholine receptors	Acetylcholine binding and downstream events	5	13	0.001	<0.0001	0.019	9606	Homo sapiens
SMK	R-HSA-622327	Postsynaptic nicotinic acetylcholine receptors	Acetylcholine binding and downstream events	5	17	0.001	<0.0001	0.026	9606	Homo sapiens
SMK	R-HSA-622323	Presynaptic nicotinic acetylcholine receptors	Acetylcholine binding and downstream events	5	15	0.001	<0.0001	0.024	9606	Homo sapiens
CKD	R-HSA-1566948	Elastic fibre formation	Elastic fibre formation	4	45	0.003	<0.0001	0.027	9606	Homo sapiens
CKD	R-HSA-2129379	Molecules associated with elastic fibres	Elastic fibre formation	4	37	0.002	<0.0001	0.026	9606	Homo sapiens
T2DM	R-HSA-1280218	Adaptive Immune System	Adaptive Immune System	98	1012	0.067	<0.0001	<0.0001	9606	Homo sapiens
T2DM	R-HSA-983170	Antigen Presentation: Folding, assembly and peptide loading of class I MHC	Class I MHC mediated antigen processing & presentation	52	108	0.007	<0.0001	<0.0001	9606	Homo sapiens
T2DM	R-HSA-1236975	Antigen processing-Cross presentation	Class I MHC mediated antigen processing & presentation	53	195	0.013	<0.0001	<0.0001	9606	Homo sapiens
T2DM	R-HSA-983169	Class I MHC mediated antigen processing & presentation	Class I MHC mediated antigen processing & presentation	71	479	0.032	<0.0001	<0.0001	9606	Homo sapiens
T2DM	R-HSA-388841	Costimulation by the CD28 family	Costimulation by the CD28 family	19	99	0.007	<0.0001	<0.0001	9606	Homo sapiens
T2DM	R-HSA-1280215	Cytokine Signaling in Immune system	Cytokine Signaling in Immune system	95	1107	0.073	<0.0001	<0.0001	9606	Homo sapiens
T2DM	R-HSA-202424	Downstream TCR signaling	TCR signaling	21	124	0.008	<0.0001	<0.0001	9606	Homo sapiens
T2DM	R-HSA-1236977	Endosomal/Vacuolar pathway	Class I MHC mediated antigen processing & presentation	49	82	0.005	<0.0001	<0.0001	9606	Homo sapiens
T2DM	R-HSA-1236974	ER-Phagosome pathway	Class I MHC mediated antigen processing & presentation	53	173	0.011	<0.0001	<0.0001	9606	Homo sapiens
T2DM	R-HSA-202433	Generation of second messenger molecules	TCR signaling	20	59	0.004	<0.0001	<0.0001	9606	Homo sapiens
T2DM	R-HSA-198933	Immunoregulatory interactions between a Lymphoid and a non-Lymphoid cell	Immunoregulatory interactions between a Lymphoid and a non-Lymphoid cell	53	316	0.021	<0.0001	<0.0001	9606	Homo sapiens
T2DM	R-HSA-909733	Interferon alpha/beta signaling	Interferon alpha/beta signaling	53	190	0.013	<0.0001	<0.0001	9606	Homo sapiens
T2DM	R-HSA-877300	Interferon gamma signaling	Interferon gamma signaling	78	252	0.017	<0.0001	<0.0001	9606	Homo sapiens
T2DM	R-HSA-913531	Interferon Signaling	Interferon Signaling	82	397	0.026	<0.0001	<0.0001	9606	Homo sapiens
T2DM	R-HSA-2132295	MHC class II antigen presentation	MHC class II antigen presentation	22	149	0.01	<0.0001	<0.0001	9606	Homo sapiens
T2DM	R-HSA-2559585	Oncogene Induced Senescence	Oncogene Induced Senescence	9	42	0.003	<0.0001	0.016	9606	Homo sapiens
T2DM	R-HSA-389948	PD-1 signaling	Costimulation by the CD28 family	19	45	0.003	<0.0001	<0.0001	9606	Homo sapiens
T2DM	R-HSA-202427	Phosphorylation of CD3 and TCR zeta chains	TCR signaling	19	45	0.003	<0.0001	<0.0001	9606	Homo sapiens
T2DM	R-HSA-9679506	SARS-CoV Infections	SARS-CoV Infections	60	639	0.042	<0.0001	<0.0001	9606	Homo sapiens
T2DM	R-HSA-9705671	SARS-CoV-2 activates/modulates innate and adaptive immune responses	SARS-CoV-2-host interactions	52	227	0.015	<0.0001	<0.0001	9606	Homo sapiens
T2DM	R-HSA-9694516	SARS-CoV-2 Infection	SARS-CoV-2 Infection	56	434	0.029	<0.0001	<0.0001	9606	Homo sapiens
T2DM	R-HSA-9705683	SARS-CoV-2-host interactions	SARS-CoV-2-host interactions	55	315	0.021	<0.0001	<0.0001	9606	Homo sapiens
T2DM	R-HSA-202403	TCR signaling	TCR signaling	22	147	0.01	<0.0001	<0.0001	9606	Homo sapiens
T2DM	R-HSA-202430	Translocation of ZAP-70 to Immunological synapse	TCR signaling	19	42	0.003	<0.0001	<0.0001	9606	Homo sapiens
Abbreviations: SBP, systolic blood pressure; DBP, diastolic blood pressure; WHR, waist-to-hip ratio; LDL, low-density lipoprotein cholesterol; TG, triglycerides; SMK, smoking; CKD, chronic kidney disease; T2DM, type 2 diabetes;
